# Supplementary material for: An electrochemical bio-electronic tongue based on borophene/PPy@ITO hybrid for selective caffeine identification
Source: Royal Society of Chemistry journal article supplement (doi:10.1039/d4an01547a), 2025-01-01
Supplement: d4an01547a1.pdf [file d4an01547a1.pdf]

## Supplementary Material

### Electrochemical Bio-Electronic Tongue with Borophene/PPy@ITO Hybrid for Selective Caffeine Identification

Shahzad Ahmed<sup>a,#,\*</sup>, Arshiya Ansari<sup>a,#,\*</sup>, Bibekananda De<sup>b</sup>, Subrata Mukherjee<sup>b</sup>, Devendra Singh Negi<sup>a,\*</sup>, Pranay Ranjan<sup>a,\*</sup>

<sup>a</sup> Department of Metallurgical and Materials Engineering, Indian Institute of Technology Jodhpur, Jodhpur, Rajasthan-342030, India.

<sup>b</sup> Composite Research and Technology (CResT), Advanced Materials and Characterization Research Group, Research and Development (R&D), Tata Steel Ltd, Jamshedpur, Jharkhand 831001, India.

\*Corresponding authors:

Shahzad Ahmed; Email: [p22mt007@iitj.ac.in](mailto:p22mt007@iitj.ac.in)

Arshiya Ansari; Email: [p22mt001@iitj.ac.in](mailto:p22mt001@iitj.ac.in)

Devendra Singh Negi; Email: [devendra@iitj.ac.in](mailto:devendra@iitj.ac.in)

Pranay Ranjan; Email: [pranay.ranjan@iitj.ac.in](mailto:pranay.ranjan@iitj.ac.in)

#S.A. and A.A. contributed equally to this paper.

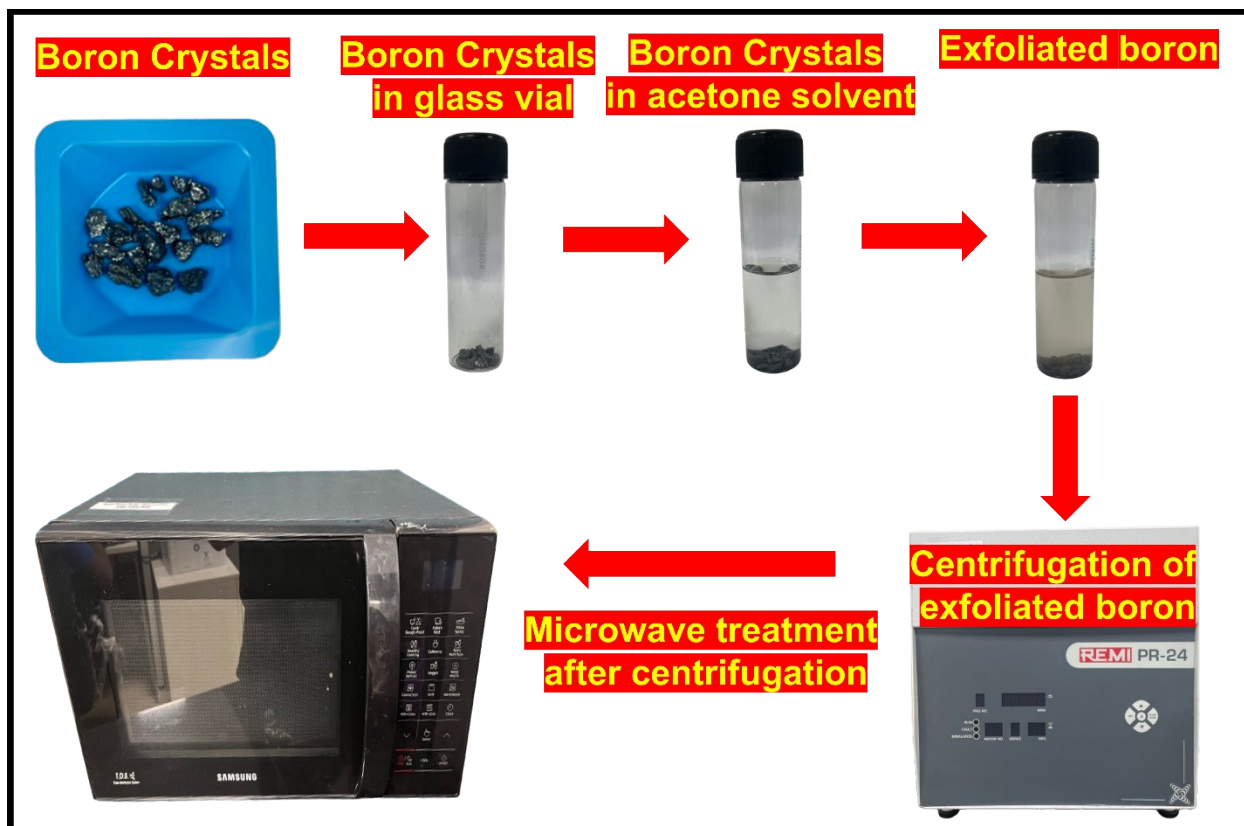

**Figure S1.** A camera image of borophene preparation.

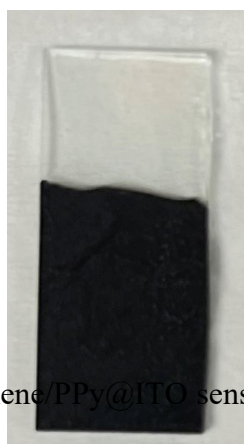

**Figure S2.** A camera image of Borophene/PPy@ITO sensor.

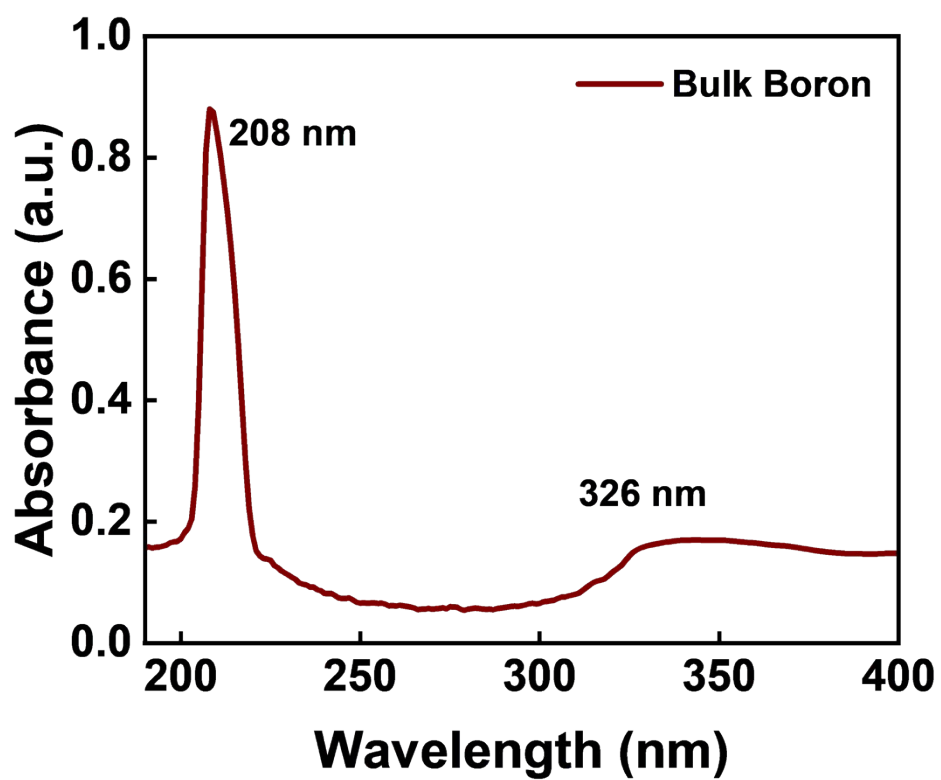

Figure S3. UV-Vis of bulk boron.

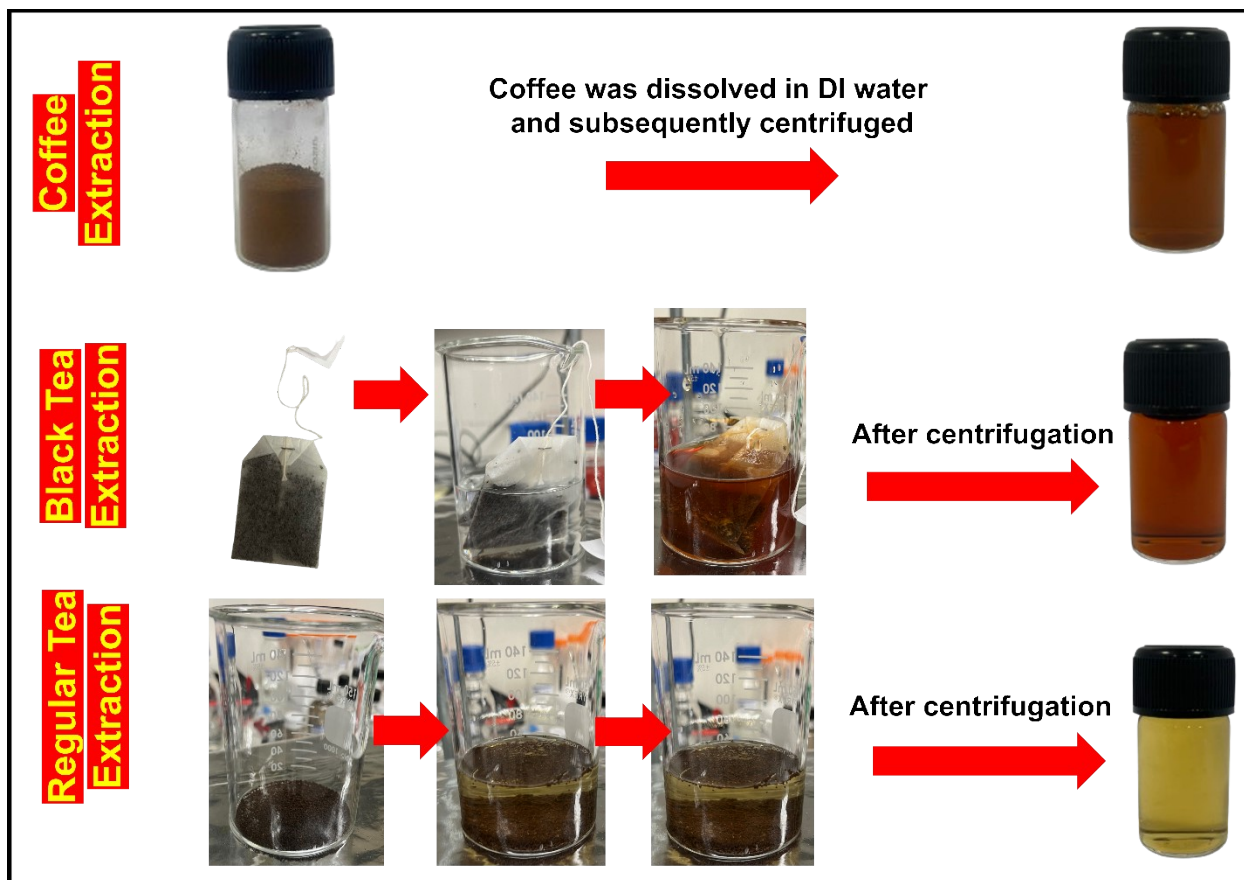

**Figure S4.** Camera images of the extraction procedure of the coffee, black tea, and regular tea.

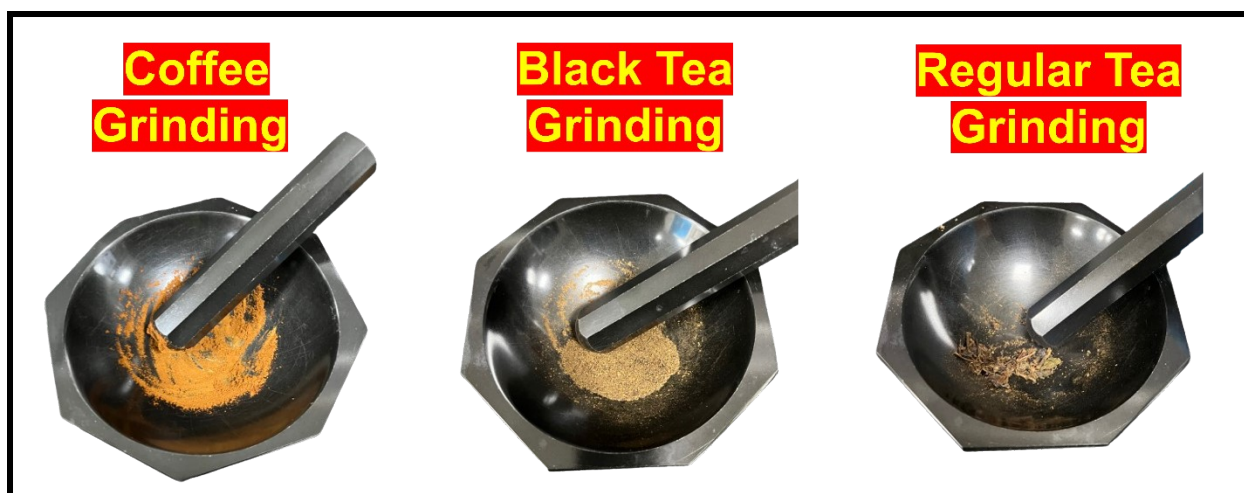

**Figure S5.** Camera images of grinding of coffee, black tea, and regular tea for XRD measurement.
